# Supplementary material
Source: PubMed Central journal article supplement (PMC5833486)

## Supplementary Online Content

Malhotra A, Wu X, Forman HP, Matouk CC, Gandhi D, Sanelli P. Management of tiny unruptured intracranial aneurysms: a comparative effectiveness analysis.

*JAMA Neurol.* Published online November 20, 2017.

doi:10.1001/jamaneurol.2017.3232

**eFigure 1.** Simplified Tree Structure

**eFigure 2.** One-Way Sensitivity Analysis Varying the Rupture Risk of Growing Aneurysms (Imaging Strategies Only)

**eFigure 3.** Two-Way Sensitivity Analysis Varying the Proportion and Rupture Risk of Growing Aneurysms

**eFigure 4.** One-Way Sensitivity Analysis Varying the QALY of SAH

**eFigure 5.** One-Way Sensitivity Analysis Assess the Impact of Mortality from SAH After Aneurysmal Rupture

This supplementary material has been provided by the authors to give readers additional information about their work.

**eFigure 1.** Simplified Tree Structure

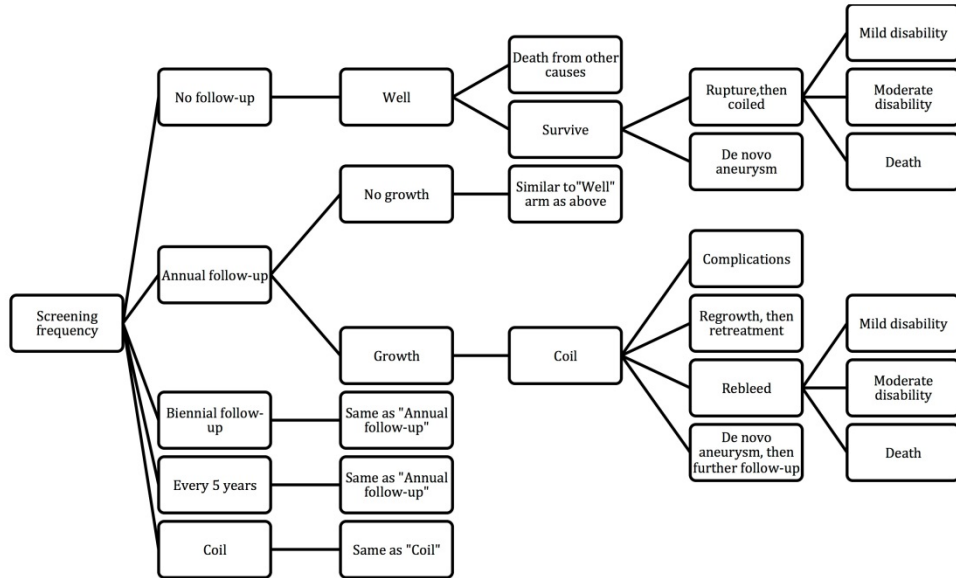

**eFigure 2.** One-Way Sensitivity Analysis Varying the Rupture Risk of Growing Aneurysms (Imaging Strategies Only)  
 A higher health benefit is more desirable.

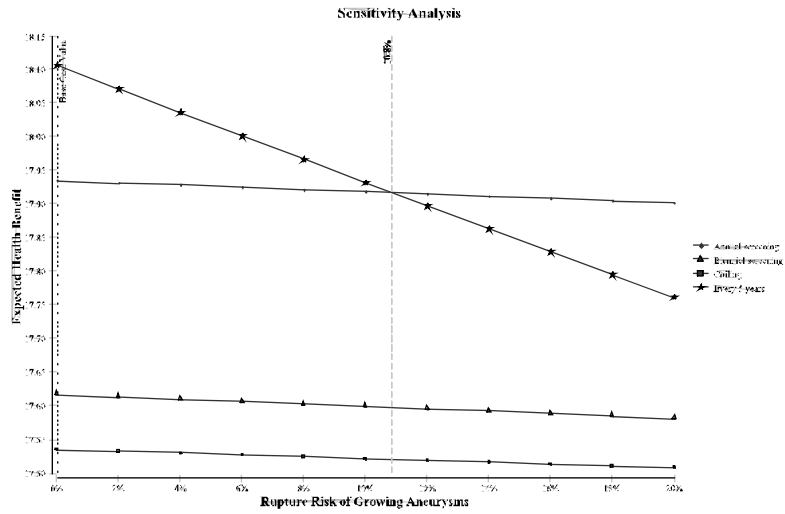

**eFigure 3.** Two-Way Sensitivity Analysis Varying the Proportion and Rupture Risk of Growing Aneurysms  
 The different colors and patters refer to the area where the corresponding strategy is optimal.

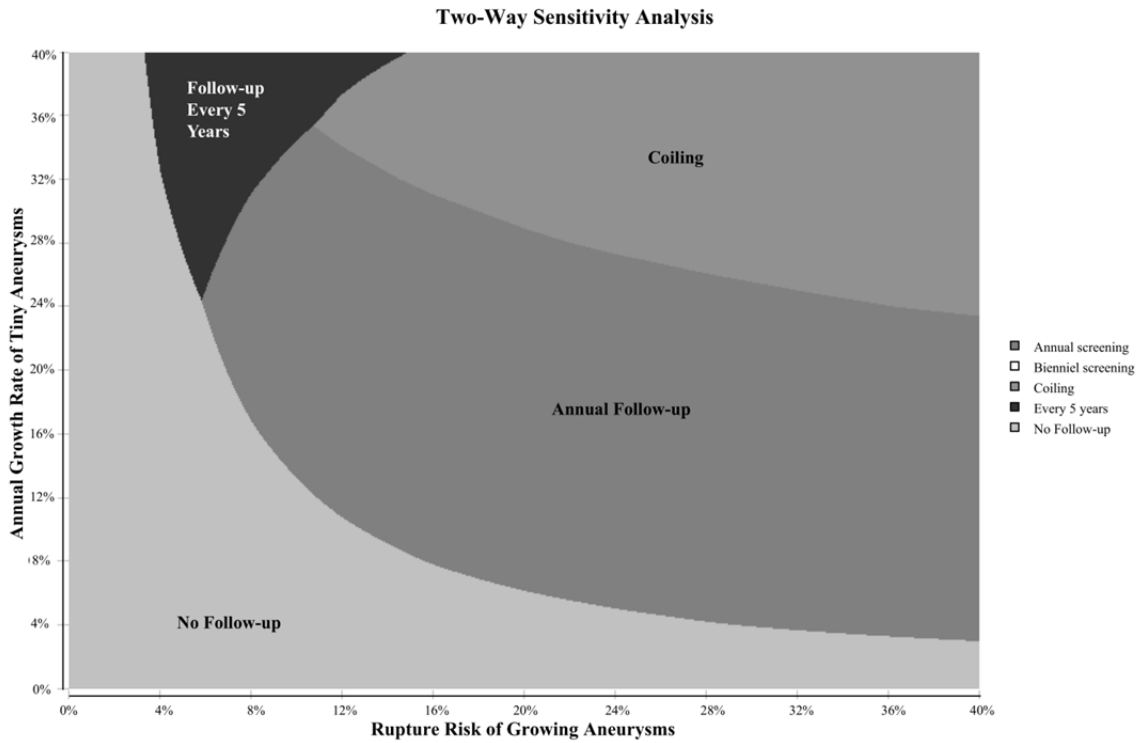

**eFigure 4.** One-Way Sensitivity Analysis Varying the QALY of SAH  
 A higher health benefit is more favorable.

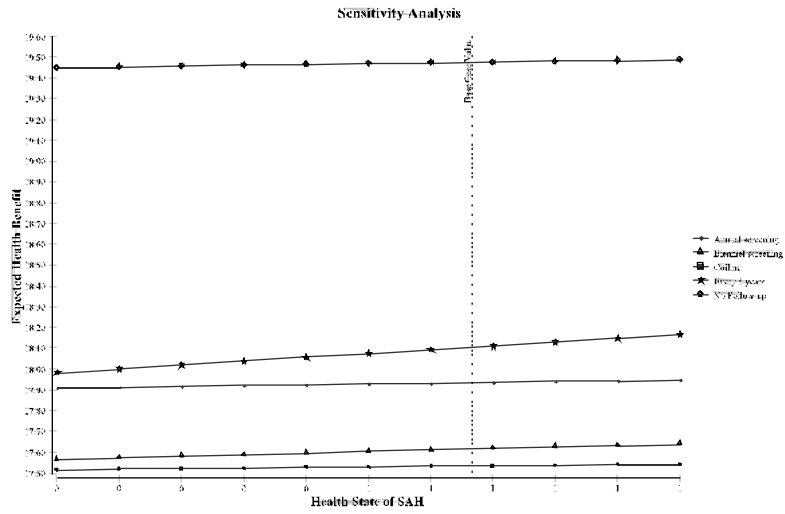

**eFigure 5.** One-Way Sensitivity Analysis Assess the Impact of Mortality from SAH After Aneurysmal Rupture  
 A higher health benefit is more favorable.

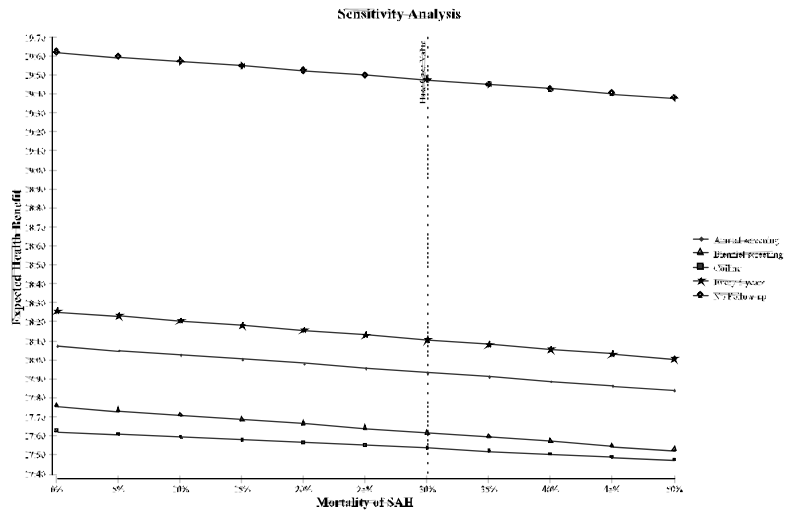

Supplement: jamaneurol-75-27-s001.pdf [file jamaneurol-75-27-s001.pdf]
